# Supplementary material for: Constructing a CoO–CuOx heterostructure for efficient electrochemical reduction of nitrate to ammonia
Source: Royal Society of Chemistry journal article supplement (doi:10.1039/d3se01024d), 2023-01-01
Supplement: d3se01024d1.pdf [file d3se01024d1.pdf]

**Supplementary Information**

**Constructing CoO-CuO<sub>x</sub> heterostructure for  
efficient electrochemical reduction of nitrate to  
ammonia**

Yujun Tang,<sup>a</sup> Sanchuan Liu,<sup>a</sup> Chengyu Guo,<sup>a</sup> Yonggang Liu,<sup>a</sup> and Zhenghua Tang<sup>\*ab</sup>

<sup>a</sup>New Energy Research Institute, School of Environment and Energy, South China  
University of Technology, Guangzhou Higher Education Mega Centre, Guangzhou,  
510006, China

E-mail: zhht@scut.edu.cn

<sup>b</sup> State Key Laboratory of Subtropical Building Science, South China University of  
Technology, Guangzhou, 510640, China

## **Experimental section**

### **Determination of nitrogen-containing substances**

Firstly, UV-Vis absorbance spectrophotometry was used to measure the standard curves for the absorbance change of each nitrogen-containing substance on a concentration gradient of different concentrations. Secondly, the nitrogenous substances in the electrolyte after the reaction were diluted to the concentration range corresponding to the calibration curve, and the ionic concentration of the nitrogenous substances in the mother liquor was measured and calculated. The steps are as follows:

#### **Determination of NH<sub>3</sub>:**

The amount of NH<sub>3</sub> in solution was determined by the indophenol blue method.<sup>1</sup> The indophenol blue method requires the usage of three reagents, which are made up as follows:

1. Preparation of a mixed solution of sodium citrate, salicylic acid, and sodium hydroxide: 5 g of salicylic acid (C<sub>7</sub>H<sub>6</sub>O<sub>3</sub>) and 5 g of sodium citrate (C<sub>6</sub>H<sub>5</sub>Na<sub>3</sub>O<sub>7</sub>) were co-dissolved in 100 mL of deionized water, then 4 g of sodium hydroxide was added and the mixture was kept stirring to ensure them completely dissolved;
2. Preparation of sodium nitroferrocyanide solution: 1 g of sodium nitroferrocyanide (Na<sub>2</sub>[Fe(CN)<sub>5</sub>NO]·2H<sub>2</sub>O) was dissolved in 100 mL water;
3. Preparation of the sodium hypochlorite solution: 8.3 g of sodium hypochlorite solution was dissolved in 100 mL of deionized water.

Take 1.8 mL of the diluted reaction solution, then add 200 μL of sodium nitrosoferricyanide solution, 2 mL of sodium hydroxide-sodium citrate mixed solution and 1 mL of sodium hypochlorite solution, and the solution was kept still for 40 mins. The absorbance at 655 nm using a 10 mm cuvette with water as reference was measured. A standard curve has been constructed using a series of standard ammonium chloride solutions.

#### **Determination of NO<sub>2</sub><sup>-</sup>:**

The NO<sub>2</sub><sup>-</sup> concentration was analyzed using the Griess test.<sup>2</sup> The Griess's reagent was prepared by dissolving P-aminobenzenesulfonamide (4 g), N-(1-naphthalenyl)-ethylenediamine dihydrochloride (0.2 g), and phosphoric acid (10 mL, 1.70 g/mL) in 50 mL of ultrapure water to make a color developing reagent. The corresponding reaction solution was made up to 5 mL to ensure that it was within the detection range. The color development reagent (100 μL) was mixed with the above diluted electrolyte and allowed to stand for 30 mins and the absorbance was recorded at 540 nm. The standard curve is established by a series of standard nitrite solutions with different concentration gradients using the same method.

#### **Determination of NO<sub>3</sub><sup>-</sup>:**

A quantity of the reacted electrolyte was taken and diluted to 5 mL to ensure that it was within the detection range. Then 100 μL of 1 M HCl, 10 μL of 0.8 wt.% sulfamic acid was added and kept still for 30 mins. Absorption spectra were measured using UV-Vis absorbance spectrophotometer. The absorbance at 220 nm and 275 nm was recorded. The final absorbance was obtained according

to the formula  $A = A_{220} - 2A_{275}$  (220, 275 is the wavelength, unit: nm). Its standard curve was established by a series of standard concentrations of nitrite solution with the same test method.

### Calculation of $\text{NH}_3$ yield, $\text{NO}_3^-$ conversion, $\text{NH}_3$ and $\text{NO}_2^-$ selectivity, and $\text{NH}_3$ Faradaic efficiency:

For NtrRR,  $\text{NH}_3$  yield was calculated by Eq. 1:

$$\text{Yield}_{\text{NH}_3} = (c_{\text{NH}_3} \times V) / (M_{\text{NH}_3} \times t \times S) \quad (1)$$

The  $\text{NO}_3^-$  conversion rate was calculated according to Eq. 2:

$$\text{Conversion} = \Delta c_{\text{NO}_3^-} / c_0 \times 100\% \quad (2)$$

The  $\text{NH}_3$  and  $\text{NO}_2^-$  selectivity was calculated by Eq. 3:

$$\text{Selectivity} = c / \Delta c_{\text{NO}_3^-} \times 100\% \quad (3)$$

The Faradaic efficiency was defined from the electric charge consumed for synthesizing ammonia and total charge passed through the electrode according to Eq. 4:

$$\text{Faradaic efficiency} = (8F \times c_{\text{NH}_3} \times V) / (M_{\text{NH}_3} \times Q) \quad (4)$$

Where  $c_{\text{NH}_3}$  is the mass concentration of  $\text{NH}_3$  (aq),  $V$  is the volume of electrolyte in the cathode compartment (50 mL),  $M_{\text{NH}_3}$  is the molar mass of  $\text{NH}_3$ ,  $t$  is the electrolysis time,  $S$  is the geometric area of the working electrode ( $1 \text{ cm}^2$ ),  $\Delta c_{\text{NO}_3^-}$  is the concentration difference of  $\text{NO}_3^-$  before and after electrolysis,  $c_0$  is the initial concentration of  $\text{NO}_3^-$ ,  $c$  is the generated concentration of ammonia or nitrite,  $F$  is the Faradaic constant ( $96485 \text{ C mol}^{-1}$ ),  $Q$  is the total charge passing the electrode.

The half-cell energy efficiency (EE) was calculated according to the theoretical energy of the  $\text{NH}_3$  product and the consumed electrical power in the three-electrode system, assuming no overpotential for the anodic oxygen evolution reaction. It follows the equation:<sup>3</sup>

$$EE (\text{NH}_3) = \frac{(E_{\text{O}_2/\text{H}_2\text{O}} - E_{\text{NH}_3/\text{NO}_3^-}) \times FE_{\text{NH}_3}}{E_{\text{O}_2/\text{H}_2\text{O}} - E_{\text{app}}}$$

Where  $E_{\text{NH}_3/\text{NO}_3^-}$  is 0.69 V vs. RHE, the thermodynamic equilibrium potential of NtrRR to  $\text{NH}_3$ ;  $E_{\text{O}_2/\text{H}_2\text{O}}$  is 1.23 V vs. RHE, the equilibrium potential of water oxidation;  $FE_{\text{NH}_3}$  represents the Faradaic efficiency for  $\text{NH}_3$ , and  $E_{\text{app}}$  is the applied potential vs. RHE.

The partial current density of  $\text{NH}_3$  ( $i_{\text{NH}_3}$ ) is calculated using the following equation<sup>4</sup>:

$$Q = it$$

$$i_{\text{NH}_3} = i \times FE_{\text{NH}_3}$$

Where  $i$  is the total current (A),  $t$  is the total reaction time (s), and  $Q$  is the total charge passing the electrode.

### Isotope labeling tests

Calibration curves for  $^1\text{H}$  NMR (400 MHz) measurements were conducted using standard solutions of  $^{15}\text{NH}_4\text{Cl}$  (>99 at.%  $^{15}\text{N}$ ,  $\geq 98.5\%$  purity) at concentrations of 50, 100, 150, 200, and 250 ppm, respectively. The method was described as follows: 60  $\mu\text{L}$  of the standard solution was mixed with 60  $\mu\text{L}$  of 15 mM maleic acid in  $\text{DMSO-}D_6$  (99.9 atom% D), 40  $\mu\text{L}$  of 2 M  $\text{H}_2\text{SO}_4$  in

DMSO-D<sub>6</sub>, and 500 μL of DMSO-D<sub>6</sub>. Na<sup>15</sup>NO<sub>3</sub> (>99 atom% <sup>15</sup>N, ≥98.5% purity) was used instead of Na<sup>14</sup>NO<sub>3</sub> as the ammonia source in a nitrate reduction isotope labeling test. The test was designed to trace the source of ammonia and determine its concentration. A 0.5 M Na<sub>2</sub>SO<sub>4</sub> solution containing Na<sup>15</sup>NO<sub>3</sub>-<sup>15</sup>N (200 ppm) was added into the cathode tank of the NtrRR. Electrolysis was stopped when the accumulated charge reached 550 C at -0.5 V vs. RHE and <sup>1</sup>H NMR was used to detect the concentration of <sup>15</sup>NH<sub>4</sub><sup>+</sup> in the electrolyte.

## Supplementary Figures

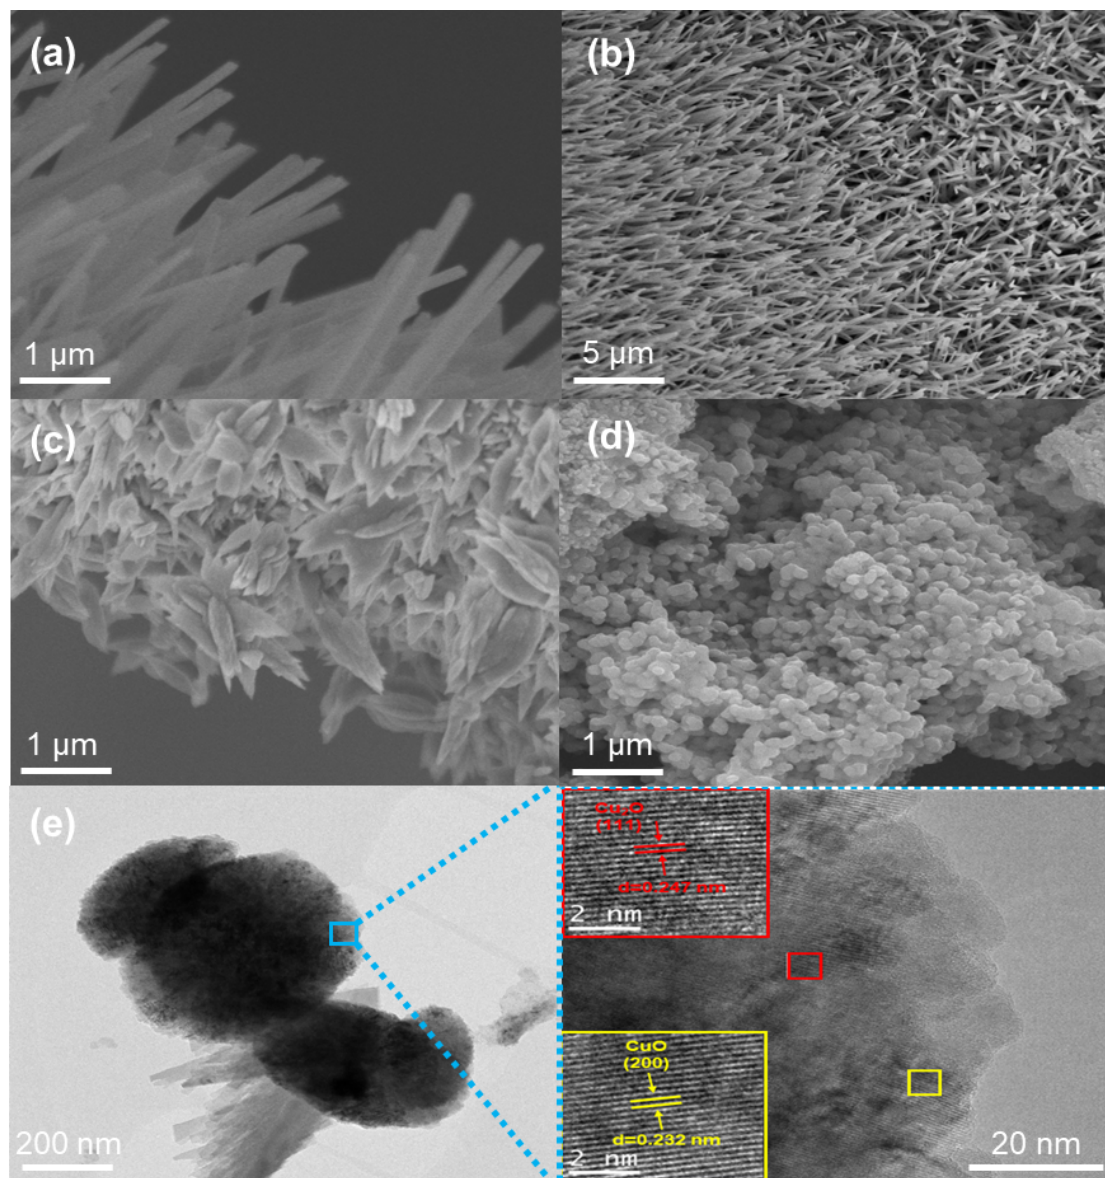

**Fig. S1** Representative SEM images of (a), (b)  $\text{Cu}(\text{OH})_2$ , (c)  $\text{CuO}_x/\text{CF}$ , (d)  $\text{CoO}/\text{CF}$ . Representative HR-TEM images of (e)  $\text{CuO}_x/\text{CF}$ .

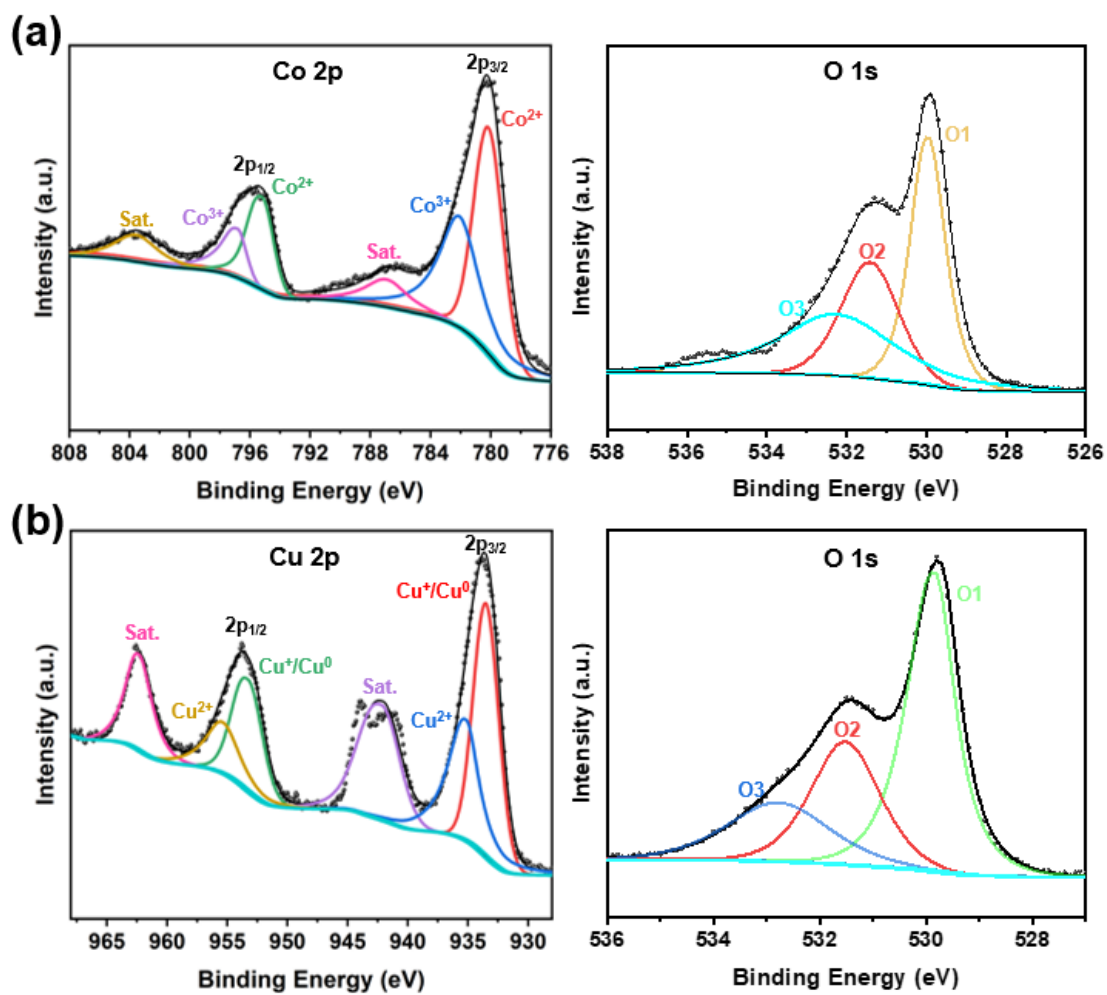

**Fig. S2** (a) High resolution XPS spectra of Co 2p (left) and O 1s (right) for CuO<sub>x</sub>/CF.  
 (b) High resolution XPS spectra of Cu 2p (left) and O 1s (right) for CoO/CF.

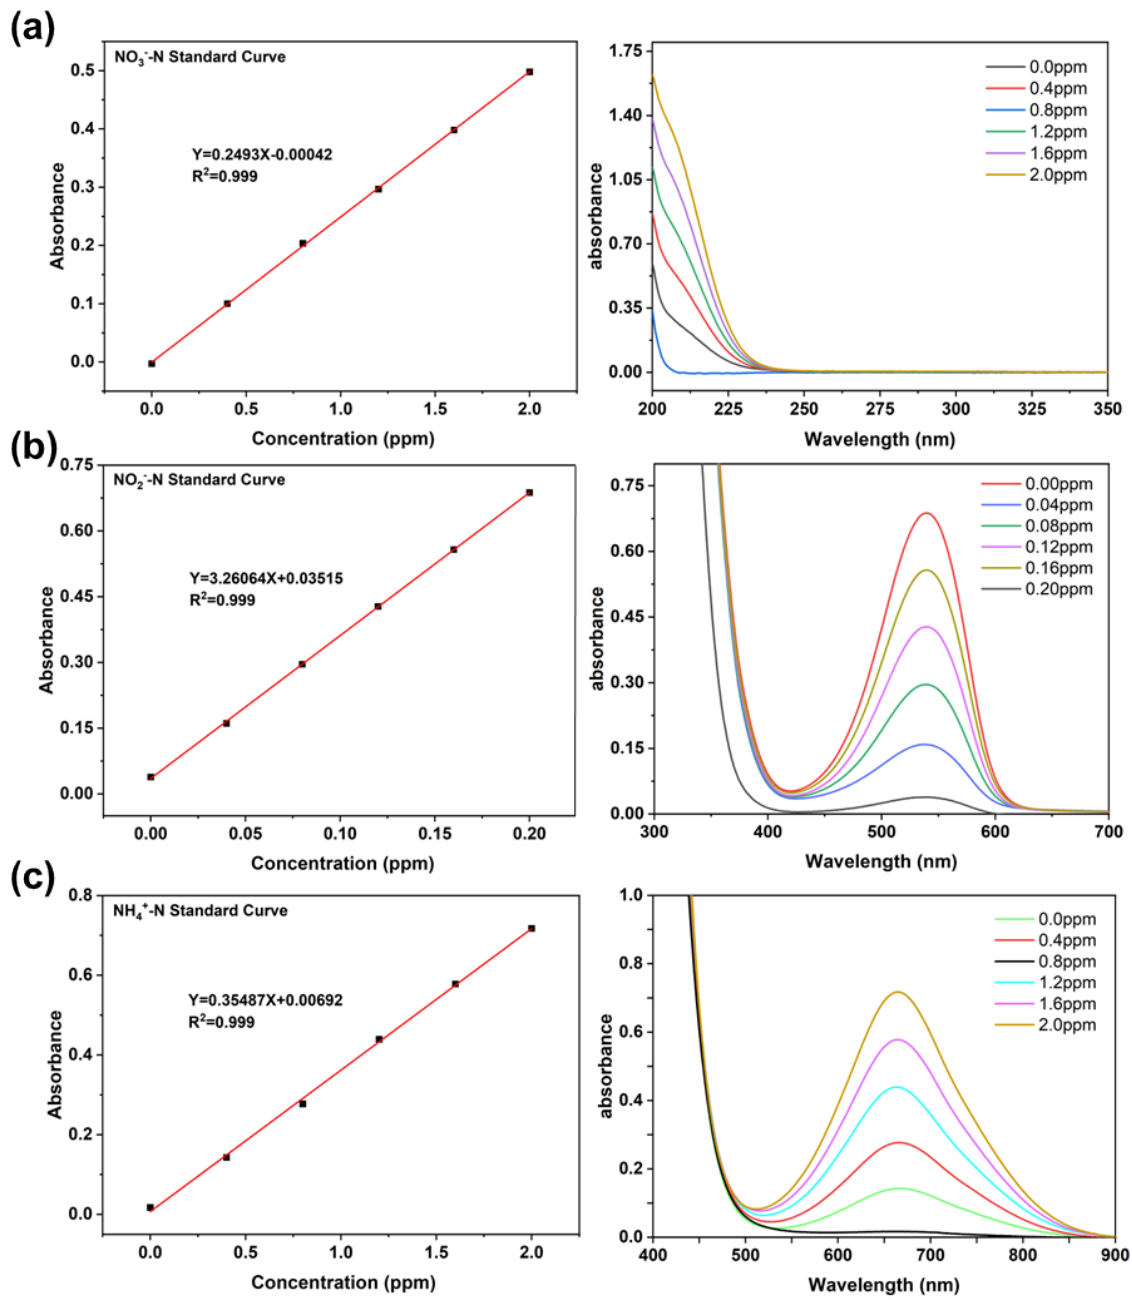

**Fig. S3** The absorbance standard curve of (a) NO<sub>3</sub><sup>-</sup>, (b) NO<sub>2</sub><sup>-</sup>, and (c) NH<sub>3</sub>.

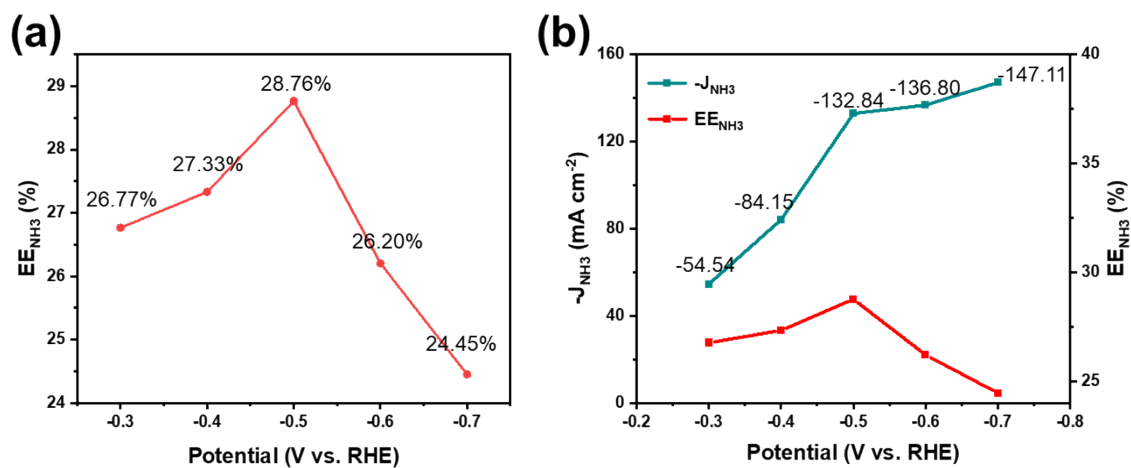

**Fig. S4** The NtrRR performance of CoO-CuO<sub>x</sub>/CF. (a) Half-cell energy efficiencies of NH<sub>3</sub>. (b) Half-cell energy efficiencies and partial current densities of NH<sub>3</sub>.



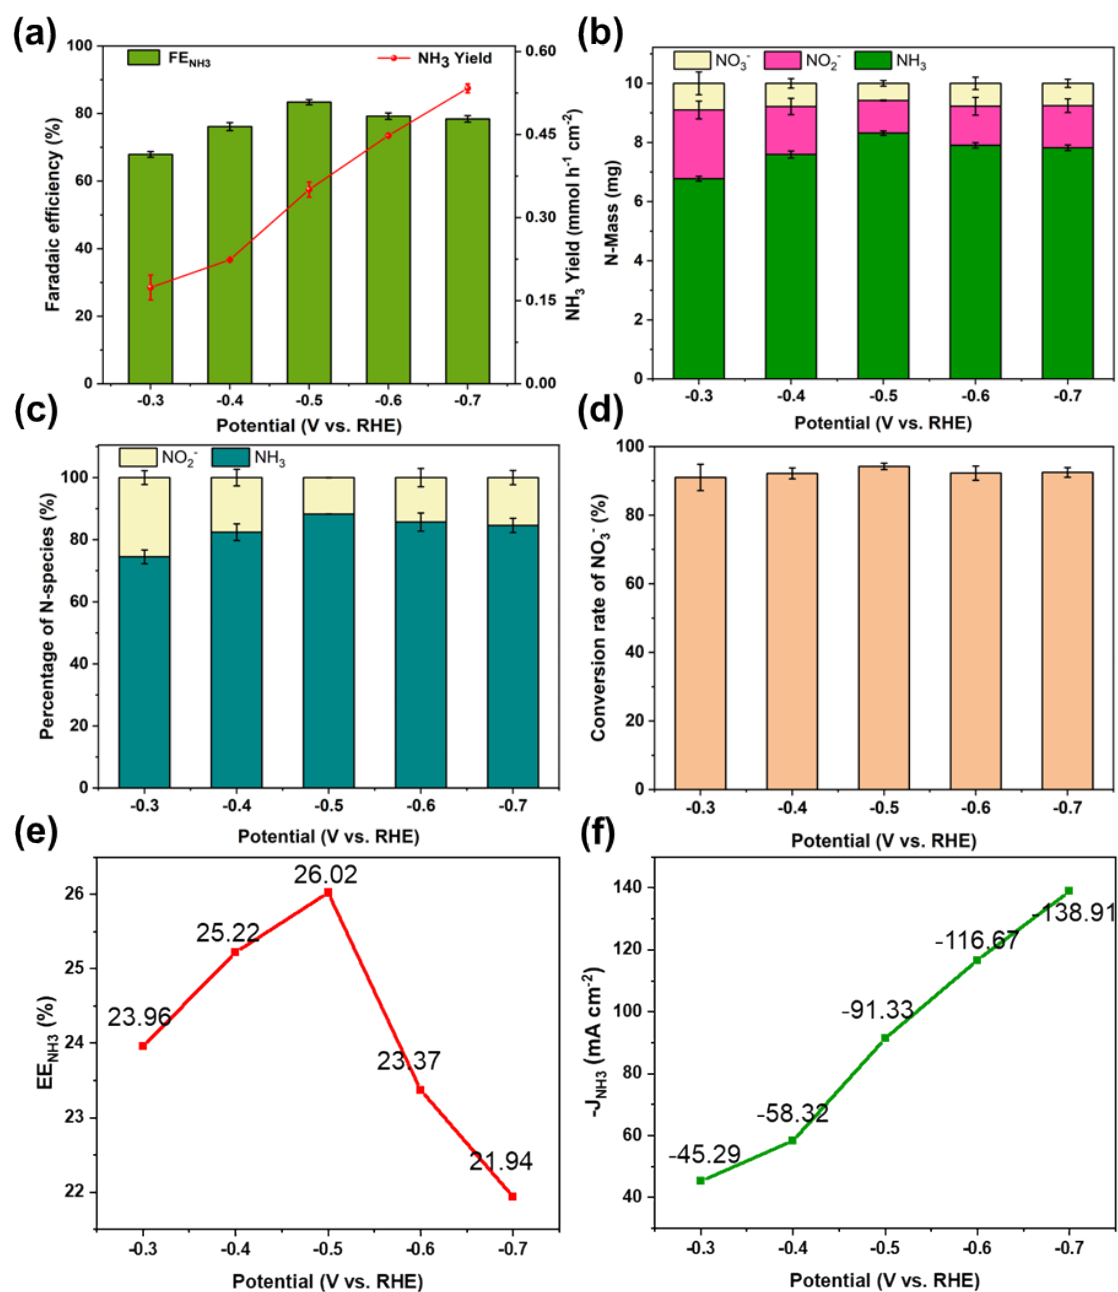

**Fig. S5** The NtrRR performance of  $CuO_x/CF$ . (a)  $FE_{NH_3}$  and  $NH_3$  yield; (b) Mass ratio of  $NO_3^-$ ,  $NO_2^-$ , and  $NH_3$ ; (c) Selectivity of  $NH_3$  and  $NO_2^-$ ; and (d)  $NO_3^-$  conversion rate. (e) Half-cell energy efficiencies of  $NH_3$ . (f) Partial current densities of  $NH_3$ .

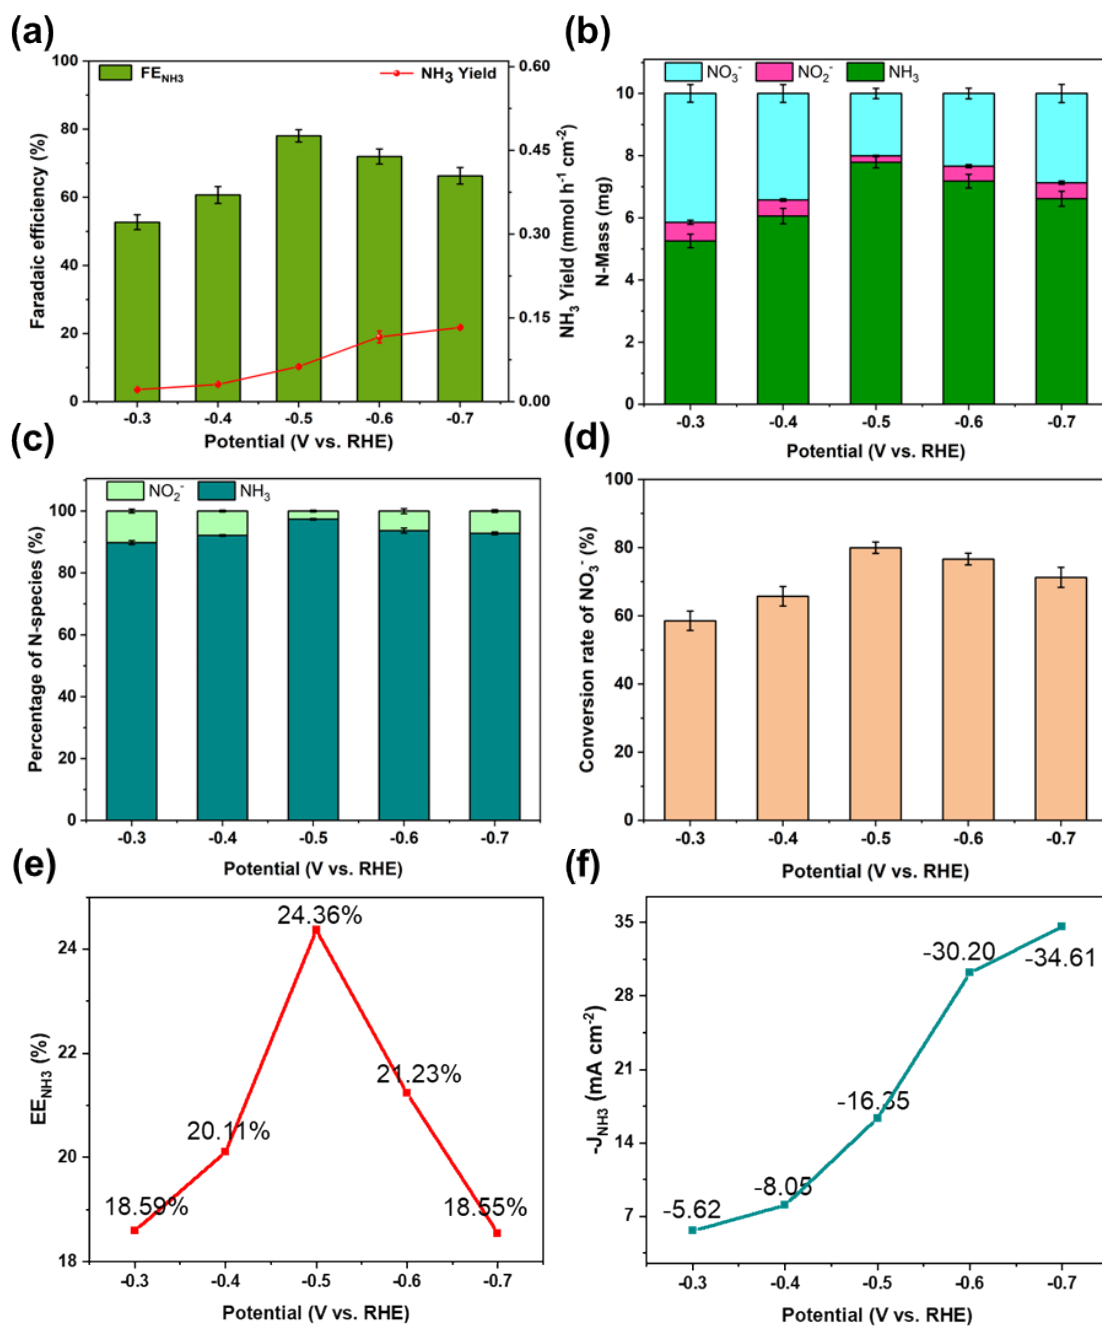

**Fig. S6** The NtrRR performance of CoO/CF. (a)  $\text{FE}_{\text{NH}_3}$  and  $\text{NH}_3$  yield; (b) Mass ratio of  $\text{NO}_3^-$ ,  $\text{NO}_2^-$ , and  $\text{NH}_3$ ; (c) Selectivity of  $\text{NH}_3$  and  $\text{NO}_2^-$ ; and (d)  $\text{NO}_3^-$  conversion rate. (e) Half-cell energy efficiencies of  $\text{NH}_3$ . (f) Partial current densities of  $\text{NH}_3$ .

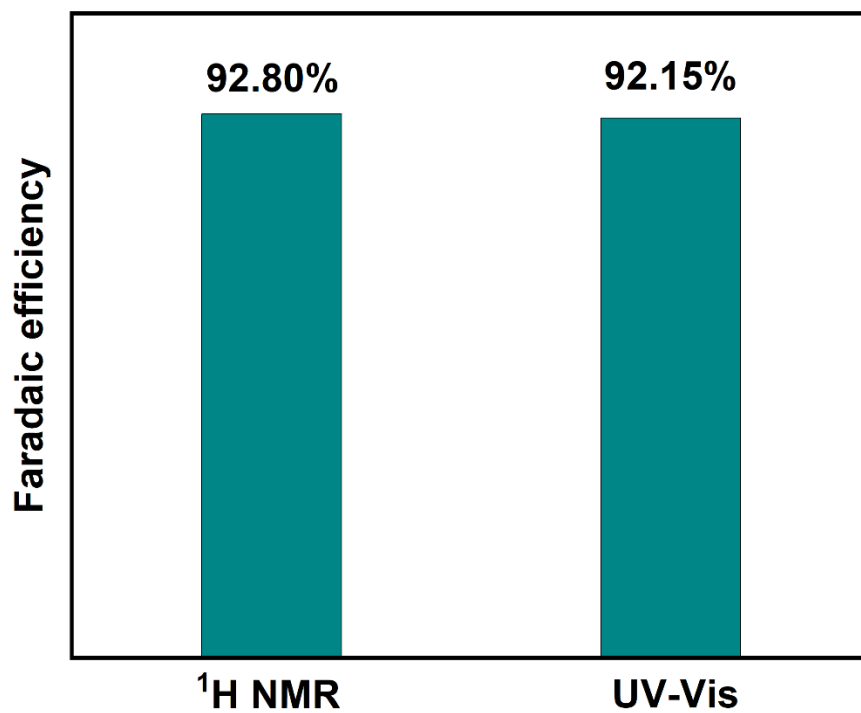

**Fig. S7** The comparison of FE<sub>NH3</sub> for CoO-CuO<sub>x</sub>/CF between the UV-Vis absorbance and <sup>1</sup>H NMR measurement.

**Supplementary Table****Table S1.** The NtrRR electrocatalytic activity comparison between CoO-CuO<sub>x</sub>/CF and other recently reported top-level electrocatalysts with similar structure or architecture.

| <b>Electrocatalysts</b>                              | <b>Electrolytes</b>                                                                                               | <b>Performance</b>                                                                                                        | <b>Ref.</b> |
|------------------------------------------------------|-------------------------------------------------------------------------------------------------------------------|---------------------------------------------------------------------------------------------------------------------------|-------------|
| CoO-CuO <sub>x</sub> /CF                             | 200 ppm NO <sub>3</sub> <sup>-</sup> -N<br>+ 0.5 M Na <sub>2</sub> SO <sub>4</sub>                                | FE <sub>NH3</sub> : 92.15%<br>NH <sub>3</sub> Selectivity: 94.29%<br>NO <sub>3</sub> <sup>-</sup> conversion rate: 97.48% | This work   |
| Cu@MOFs                                              | 70 ppm NO <sub>3</sub> <sup>-</sup> -N<br>+ 0.05 M Na <sub>2</sub> SO <sub>4</sub>                                | FE <sub>NH3</sub> : 80.97%<br>NH <sub>3</sub> Selectivity: 61.64%                                                         | 5           |
| Mn <sub>3</sub> O <sub>4</sub> /CuO <sub>x</sub> /CF | 200 ppm NO <sub>3</sub> <sup>-</sup> -N<br>+ 0.5 M Na <sub>2</sub> SO <sub>4</sub>                                | FE <sub>NH3</sub> : 87.56%                                                                                                | 6           |
| Co/NC-800                                            | 100 ppm NO <sub>3</sub> <sup>-</sup> -N<br>+ 0.1 M Na <sub>2</sub> SO <sub>4</sub>                                | FE <sub>NH3</sub> : 81.2%                                                                                                 | 7           |
| Cu/TNTA                                              | 100 ppm NO <sub>3</sub> <sup>-</sup> -N<br>+ 0.1 M Na <sub>2</sub> SO <sub>4</sub>                                | NO <sub>3</sub> <sup>-</sup> conversion rate: 84.3%                                                                       | 8           |
| oxide-derived Cu                                     | 100 ppm NO <sub>3</sub> <sup>-</sup> -N<br>+ 0.5 M Na <sub>2</sub> SO <sub>4</sub>                                | FE <sub>NH3</sub> : 80%<br>NH <sub>3</sub> Selectivity: 94%<br>NO <sub>3</sub> <sup>-</sup> conversion rate: 93%          | 9           |
| Cu/Fe@NCNFs                                          | 100 ppm NO <sub>3</sub> <sup>-</sup> -N<br>+ 0.1 M Na <sub>2</sub> SO <sub>4</sub><br>+ 0.02 M NaCl               | NO <sub>3</sub> <sup>-</sup> conversion rate: 76%                                                                         | 10          |
| Cu-N-C                                               | 50 ppm NO <sub>3</sub> <sup>-</sup> -N<br>+ 0.5 M Na <sub>2</sub> SO <sub>4</sub><br>+ 2.0 g L <sup>-1</sup> NaCl | NH <sub>3</sub> Selectivity: 94%                                                                                          | 11          |
| Cu@C                                                 | 1 mM KNO <sub>3</sub> + 1<br>M KOH                                                                                | FE <sub>NH3</sub> : 72.0%                                                                                                 | 12          |

## References

1. D. Zhu, L. Zhang, R. E. Ruther and R. J. Hamers, *Nat. Mater.*, 2013, **12**, 836-841.
2. F.-Y. Chen, Z.-Y. Wu, S. Gupta, D. J. Rivera, S. V. Lambeets, S. Pecaut, J. Y. T. Kim, P. Zhu, Y. Z. Finfrock, D. M. Meira, G. King, G. Gao, W. Xu, D. A. Cullen, H. Zhou, Y. Han, D. E. Perea, C. L. Muhich and H. Wang, *Nat. Nanotechnol.*, 2022, **17**, 759-767.
3. Y. Zhou, R. Duan, H. Li, M. Zhao, C. Ding and C. Li, *ACS Catal.*, 2023, **13**, 10846-10854.
4. M. Yang, B. Li, S. Li, Q. Dong, Z. Huang, S. Zheng, Y. Fang, G. Zhou, X. Chen, X. Zhu, T. Li, M. Chi, G. Wang, L. Hu and Z. J. Ren, *Nano Lett.*, 2023, **23**, 7733-7742.
5. Y. Chen, J. Li, G. Jiang, B. Xu, J. Zhang, H. Zhang and S. Shu, *J. Environ. Chem. Eng.*, 2023, **11**, 110472.
6. J. Hu, A. Ma, X. Wu, Y. Yin, D. Liu, A. T. Kuvarega, B. B. Mamba and J. Gui, *Chem. Commun.*, 2023, **59**, 7232-7235.
7. H. Liu, J. Qin, J. Mu and B. Liu, *J. Colloid Interface Sci.*, 2023, **636**, 134-140.
8. Q. Song, S. Zhang, X. Hou, J. Li, L. Yang, X. Liu and M. Li, *J. Hazard. Mater.*, 2022, **438**, 129455.
9. L. Fang, S. Wang, C. Song, S. Lu, X. Yang, X. Qi and H. Liu, *Chem. Eng. J.*, 2022, **446**, 137341.
10. Y. Lan, H. Luo, Y. Ma, Y. Hua, T. Liao and J. Yang, *Nanoscale*, 2021, **13**, 10108-10115.
11. H. Chen, C. Zhang, L. Sheng, M. Wang, W. Fu, S. Gao, Z. Zhang, S. Chen, R. Si, L. Wang and B. Yang, *J. Hazard. Mater.*, 2022, **434**, 128892.
12. Z. Song, Y. Liu, Y. Zhong, Q. Guo, J. Zeng and Z. Geng, *Adv. Mater.*, 2022, **34**, 2204306.
